# Supplementary material for: Childhood Maltreatment Associated with Anxiety and Depression and Complex PTSD Symptoms
Source: PubMed Central journal article supplement — Psychiatry Clin Psychopharmacol. 2024 Sep 1;34(3):201–9. doi: 10.5152/pcp.2024.24842 (PMC11500457; doi:10.5152/pcp.2024.24842), 2024-09-01
Supplement: supplementary_material.pdf [file supplementary_material.pdf]

**Supplementary Table 1.** The Regression Analysis to Test the Relationship Between Variables

| Independence variable | Dependence variable | B     | CI             | $\beta$ |
|-----------------------|---------------------|-------|----------------|---------|
| CTQ                   | ITQ                 | 8.35  | 4.32 - 12.38   | .36***  |
|                       | Friend support      | -6.26 | -11.26 - -1.26 | -.23*   |
|                       | Family support      | -5.00 | -7.85 - -2.15  | -.31**  |
| Friend support        | ITQ                 | -.29  | -.44 - -.14    | -.34*** |
| Family support        |                     | -.64  | -.88 - -.39    | -.44*** |

\*p < .05, \*\*p < .01, \*\*\*p < .001. CTQ, Childhood Trauma Questionnaire; ITQ, International Trauma Questionnaire. The score of “Family support” and “Friend support” were calculated by the subscales of MSPSS.

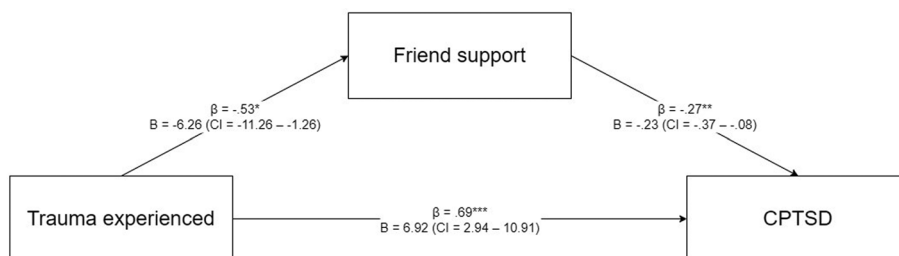

**Supplementary Figure 1.** The partial mediating effect of friend support between maltreatment and CPTSD symptoms.

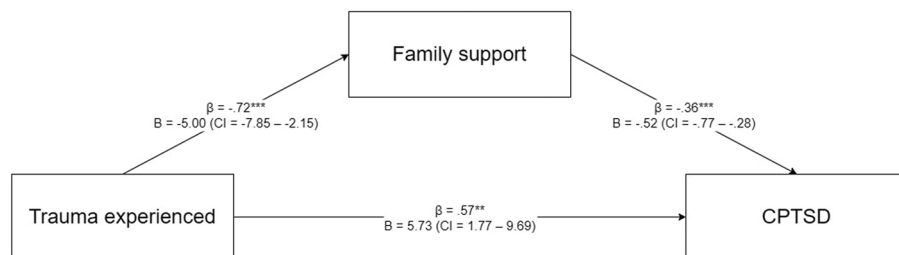

**Supplementary Figure 2.** The partial mediating effect of family support between maltreatment and CPTSD symptoms. \*\*p < .01, \*\*\*p < .001. CTQ, Childhood Trauma Questionnaire; ITQ, International Trauma Questionnaire. The score of “Family support” and “Friend support” were calculated by the subscales of MSPSS.
